# Supplementary material for: Sequence Polymorphism, Segmental Recombination and Toggling Amino Acid Residues within the DBL3X Domain of the VAR2CSA Placental Malaria Antigen
Source: PubMed Central journal article supplement (PMC3276574; doi:10.1371/journal.pone.0031565), 2012-02-09
Supplement: pone.0031565.s001.pdf [file pone.0031565.s001.pdf]

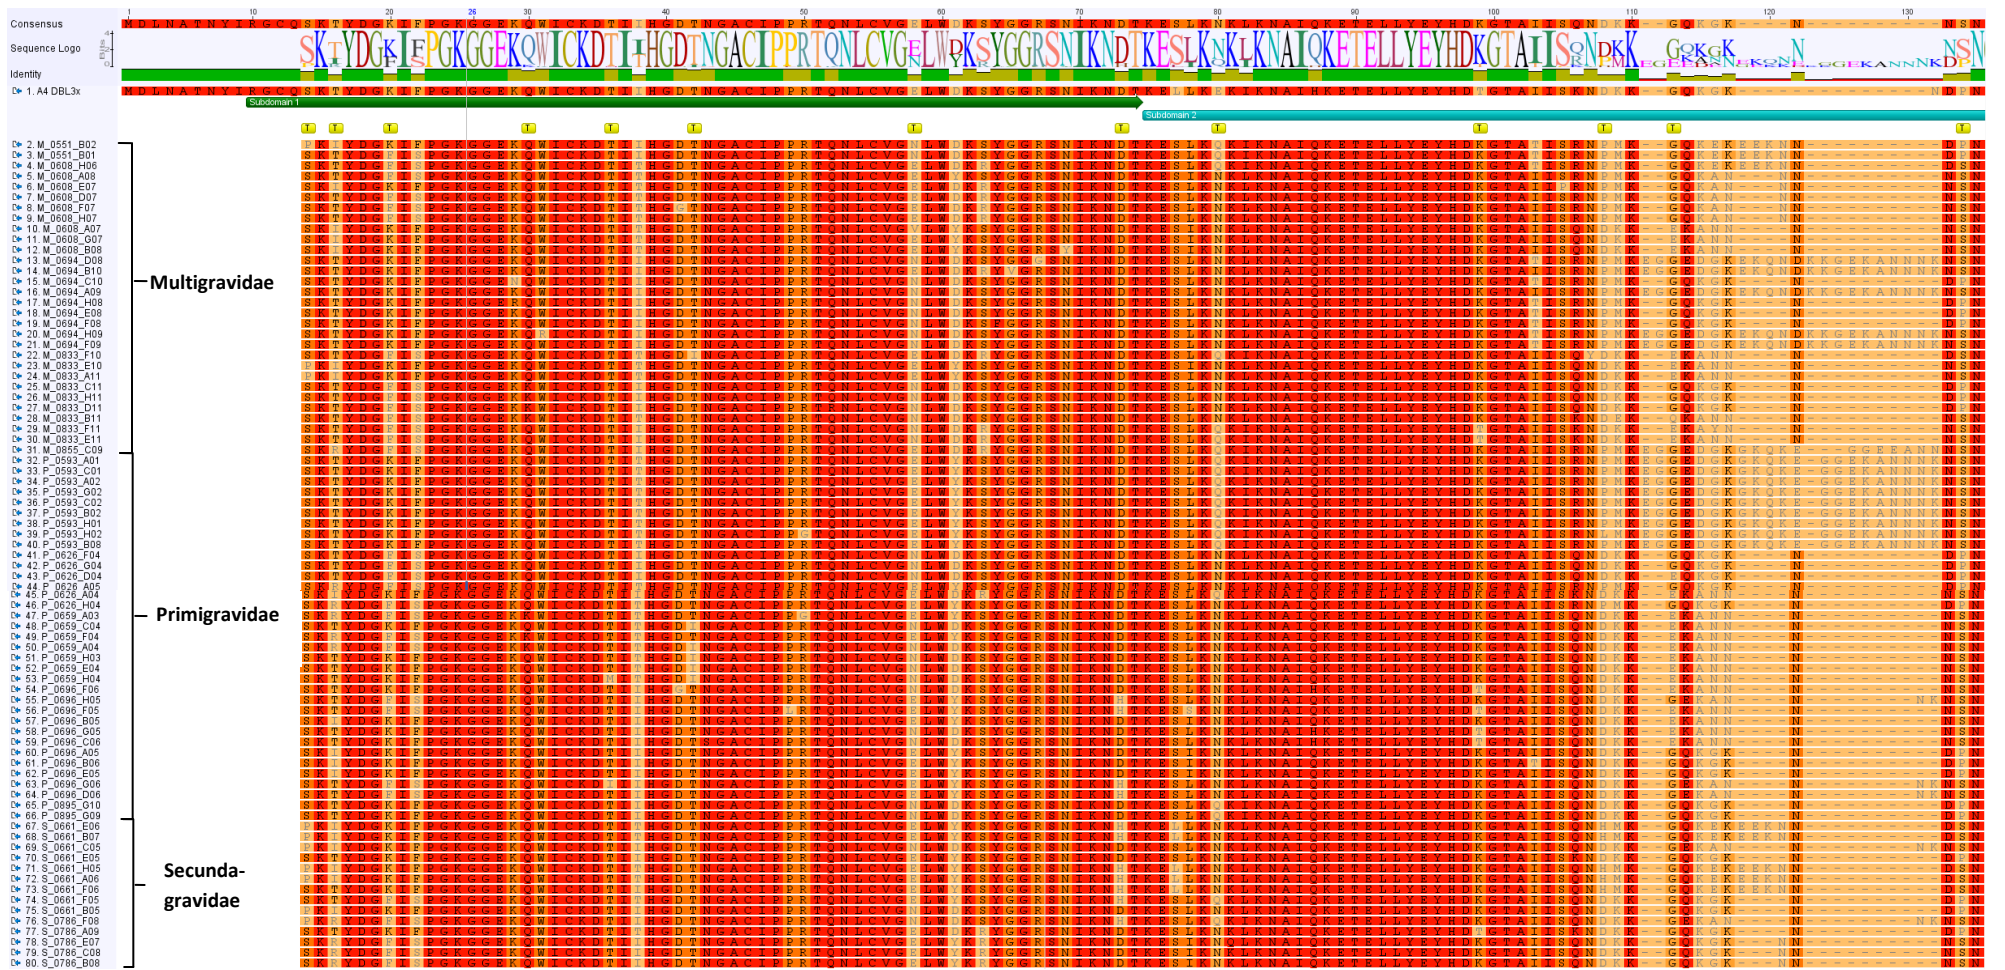

**Supplementary Figure 1. Amino acid alignment of 79 var2csa DBL3x domains.** Individual subdomains are denoted by arrows above alignment. Toggling sites are marked by a "T" above the relevant amino acid site. Motifs identified in this study and in Dahlback at al. [33] are denoted by black boxes. Amino acid residues are colored according to conservation.

140 147 150 160 170 180 190 200 210 220 230 240 250 260 270  
 GLP KGFCHAVORSFIDYKNNMLIGTSVNIYEYIGKLOEDIKKITEKSTPKQK KIV GSGADKVN DNNWIKGTEREMIMGAVKCGFKLKKKKNNGTESGDECGVSPPTGNDEDQVSVIFKEWGEQFCIERLRQYEQN

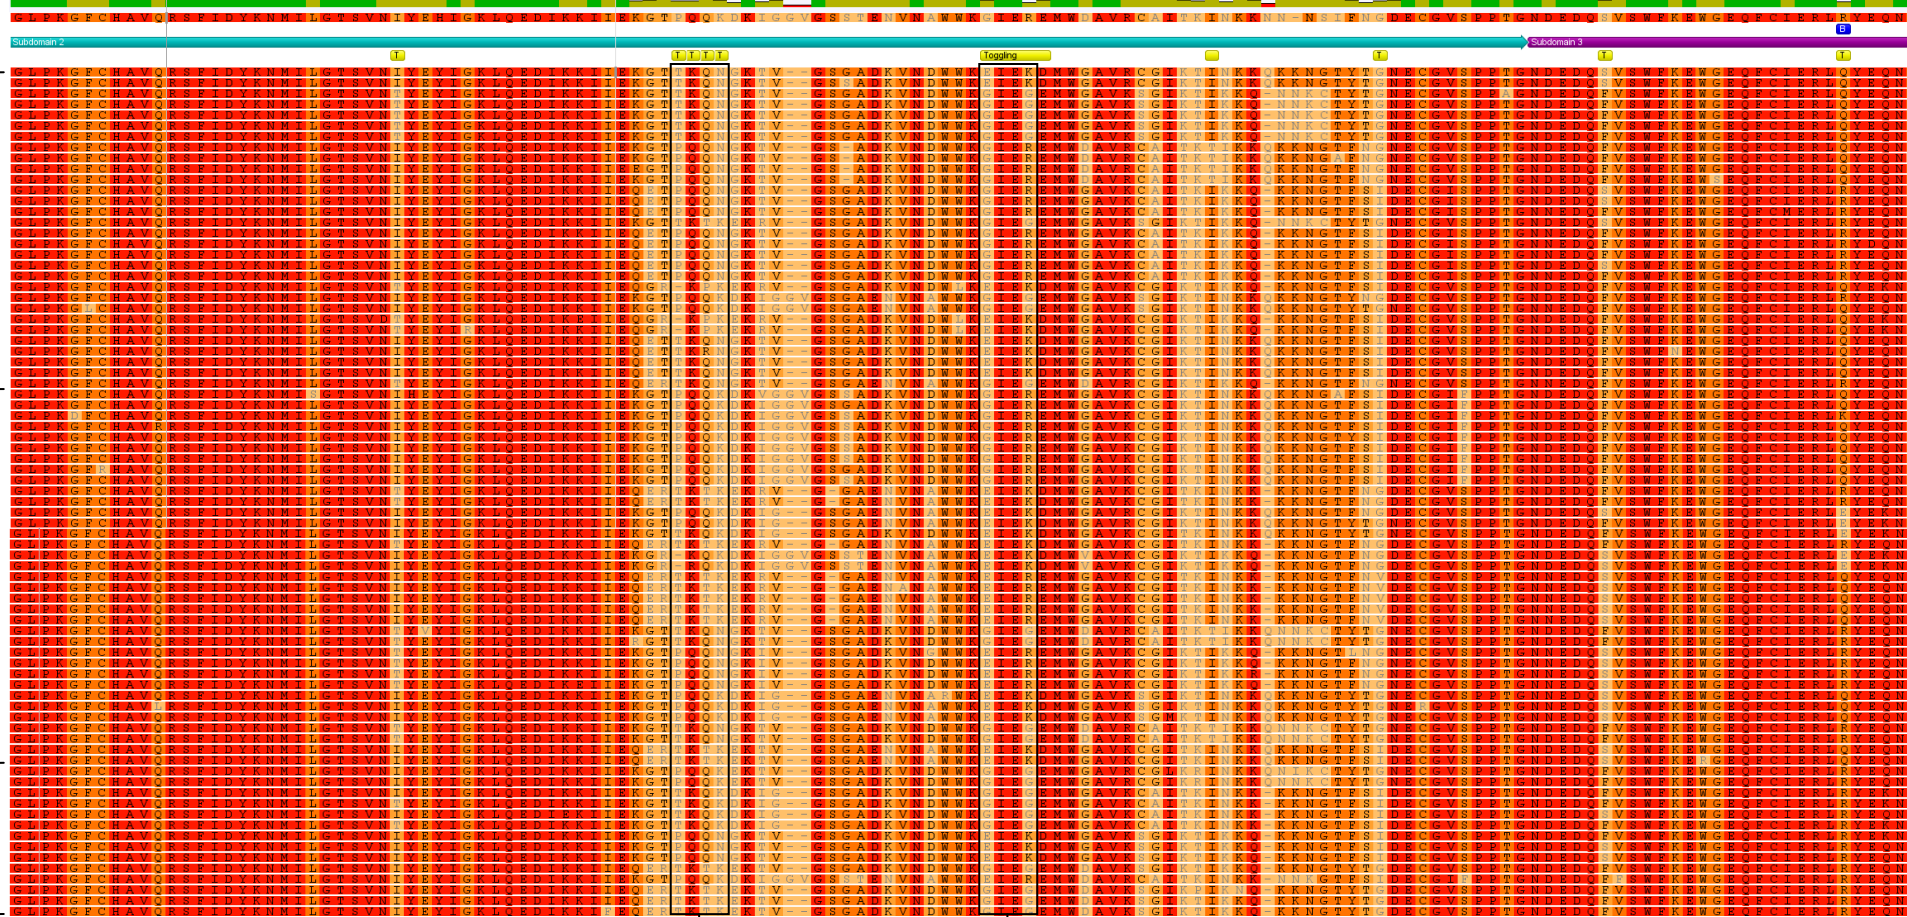

New motifs identified in this study unique to Kenyan samples

Dahlback et. al [33], identified motifs.
