# Supplementary material for: Sequence Polymorphism, Segmental Recombination and Toggling Amino Acid Residues within the DBL3X Domain of the VAR2CSA Placental Malaria Antigen
Source: PubMed Central journal article supplement (PMC3276574; doi:10.1371/journal.pone.0031565), 2012-02-09
Supplement: pone.0031565.s003.pdf [file pone.0031565.s003.pdf]

| Recombinant                      | Breakpoints |     | Major Parent | Minor Parent | Detection Method                                        | p-value |
|----------------------------------|-------------|-----|--------------|--------------|---------------------------------------------------------|---------|
|                                  | Begin       | End |              |              |                                                         |         |
| Global Analysis                  |             |     |              |              |                                                         |         |
| M_0608_A07, B08, G07             | 4           | 377 | M_0833_A11   | M_0608_H07   | RDP, MaxChi, Chimaera, SiScan, 3Seq                     | 0.05    |
| M_0694_A08, D07, E07             | 398         | 645 | M_0608_H07   | M_0608_H06   | RDP, MaxChi, 3Seq                                       | 0.05    |
| M_0833_H11, C11, F10             | 524         | 748 | S_0661_E06   | S_0661_B05   | RDP, GENECONV, MaxChi, Chimaera, SiScan, 3Seq           | 0.05    |
| M_0855_C09                       | 327         | 861 | P_0659_C04   | P_0626_D04   | GENECONV, MaxChi, Chimaera, 3Seq                        | 0.05    |
| P_0626_H04                       | 410         | 942 | P_0626_A05   | P_0626_G04   | MaxChi, Chimaera, 3Seq                                  | 0.05    |
| S_0661_A06, H05                  | 484         | 958 | S_0661_E06   | S_0661_C05   | GENECONV, MaxChi, Chimaera, 3Seq                        | 0.05    |
| S_0661_F06                       | 129         | 425 | S_0661_C05   | S_0661_E06   | RDP, Chimaera, MaxChi, 3Seq                             | 0.05    |
| Individual Analysis              |             |     |              |              |                                                         |         |
| M_0608_A07, B08                  | 364         | 674 | M_0608_H06   | M_0608_E07   | GENECONV, MaxChi, Chimaera, 3Seq                        | 0.05    |
| M_0608_A08                       | 38          | 215 | M_0608_G07   | M_0608_F07   | GENECONV, MaxChi, Chimaera, 3Seq                        | 0.05    |
| M_0608_D07                       | 28          | 104 | M_608_F07    | M_0608_G07   | GENECONV, MaxChi, Chimaera, 3Seq                        | 0.05    |
| M_0608_E07                       | 105         | 935 | M_0608_F07   | M_0608_A07   | GENECONV, MaxChi, Chimaera, 3Seq                        | 0.05    |
| M_0608_G07                       | 272         | 614 | M_0608_H06   | M_0608_E07   | GENECONV, MaxChi, Chimaera, 3Seq                        | 0.05    |
| M_0608_H06                       | 284         | 674 | M_0608_F07   | M_0608_G07   | GENECONV, MaxChi, Chimaera, 3Seq                        | 0.05    |
| M_608_H07                        | 410         | 639 | M_0608_B08   | M_0608_D07   | GENECONV, MaxChi, Chimaera, 3Seq                        | 0.05    |
| M_694_A09                        | 370         | 687 | M_0694_A09   | M_0694_B10   | BootScan, GENECONV, MaxChi, Chimaera, SiScan, 3Seq      | 0.05    |
| M_694_C10, E08, F08, H08         | 281         | 717 | M_0694_B10   | M_0694_H09   | MaxChi, Chimaera, SiScan, 3Seq                          | 0.05    |
| M_0833_A11, F10, H11             | 495         | 908 | M_0833_F11   | M_0833_C11   | RDP, BootScan, GENECONV, MaxChi, Chimaera, SiScan, 3Seq | 0.05    |
| M_0833_C11                       | 524         | 716 | M_0833_A11   | M_0833_F11   | RDP, BootScan, GENECONV, MaxChi, Chimaera, 3Seq         | 0.05    |
| M_0833_D11                       | 121         | 392 | M_0833_E10   | M_0833_B11   | RDP, BootScan, GENECONV, MaxChi, Chimaera, 3Seq         | 0.05    |
| P_0593 No Recombination Detected |             |     |              |              |                                                         |         |

|                           |     |     |            |            |                                                         |      |
|---------------------------|-----|-----|------------|------------|---------------------------------------------------------|------|
| P_0626_A05                | 277 | 367 |            | P_0626_A04 | GENECONV, MaxChi, SiScan, 3seq                          | 0.05 |
| P_0626_D04                | 409 | 808 | P_0626_A05 | P_0626_F04 | BootScan, MaxChi, Chimaera, SiScan                      | 0.05 |
| P_0626_F04, G04, H04      | 256 | 535 | P_0626_A04 | P_0626_A03 | BootScan, MaxChi, Chimaera, SiScan                      | 0.05 |
| P_0659_A04, H04           | 68  | 939 | P_0659_A03 | P_0659_E04 | RDP, BootScan, GENECONV, MaxChi, Chimaera, SiScan, 3Seq | 0.05 |
| P_0659_C04                | 366 | 912 | P_0659_H03 | P_0659_A03 | BootScan, MaxChi, Chimaera, SiScan, 3Seq                | 0.05 |
| P_0696_B05                | 262 | 920 | P_0696_B06 | P_0696_C06 | RDP, SiScan, MaxChi, 3Seq                               | 0.05 |
| P_0696_F05                | 265 | 870 | P_0696_H05 | P_0696_B05 | BootScan, MaxChi, SiScan, 3Seq                          | 0.05 |
| P_0696_F06                | 506 | 842 | P_0696_G05 | P_0696_H05 | GENECONV, MaxChi, BootScan, MaxChi, SiScan, 3Seq        | 0.05 |
| S_0661_A06                | 218 | 484 | S_0661_B05 | S_0661_C05 | GENECONV, MaxChi, BootScan, 3Seq                        | 0.05 |
| S_0661_B05                | 219 | 832 | S_0661_C05 | S_0661_F05 |                                                         | 0.05 |
| S_0661_B07, E06, F05, F06 | 435 | 913 | S_0661_A06 | S_0661_C05 | RDP, GENECONV, BootScan, MaxChi, Chimaera, 3Seq         | 0.05 |
| S_0661_C05                | 597 | 689 | S_0661_E06 | S_0661_B05 | RDP, GENECONV, Chimaera, SiScan, 3Seq                   | 0.05 |
| S_0661_E05                | 219 | 483 | S_0661_E05 | S_0661_B05 | GENECONV, BootScan, MaxChi, 3Seq                        | 0.05 |
| S_0786_A09                | 358 | 786 | S_0786_C09 | S_0786_F08 | GENECONV, MaxChi, Chimaera, 3Seq                        |      |
| M_0551 only two seqs.     |     |     |            |            |                                                         |      |

**Table S2:** Summary table of recombination analysis via RDP4 [38] at a global level (all sequences) and individual samples (same patient clusters). Data shows recombination breakpoints related to the sequence of the transferred fragment (major parent) and sequence closely related to transferred fragment (minor parent) including resulting recombinant. For statistical analysis the Chi-square statistical test in RDP4 was used.
