# Supplementary material for: Sequence Polymorphism, Segmental Recombination and Toggling Amino Acid Residues within the DBL3X Domain of the VAR2CSA Placental Malaria Antigen
Source: PLOS journal article supplement (doi:10.1371/journal.pone.0031565), 2012-02-09
Supplement: S2 (10.1371/journal.pone.0031565.s002) [file journal.pone.0031565.s002]

| Toggle Site | Primigravidae (N=35) |               |               | Multigravidae (N= 30) |               |               | aa Site |        |           |
|-------------|----------------------|---------------|---------------|-----------------------|---------------|---------------|---------|--------|-----------|
| 1           | S                    | P             |               | S                     | P             |               | 1232    |        |           |
|             | 85.70%               | 14.30%        |               | 90.00%                | 10.00%        |               |         |        |           |
| 2           | R                    | I             | <b>T*</b>     | R                     | I             | <b>T*</b>     | 1234    |        |           |
|             | 18.40%               | 22.40%        | <b>59.00%</b> | 3.30%                 | 23.30%        | <b>73.30%</b> |         |        |           |
| 3           | K                    | F             |               | K                     | F             |               | 1238    |        |           |
|             | 65.30%               | 34.70%        |               | 53.30%                | 46.70%        |               |         |        |           |
| 4           | Q                    | K             |               | Q                     | K             |               | 1248    |        |           |
|             | 93.80%               | 6.20%         |               | 86.70%                | 13.30%        |               |         |        |           |
| 5           | I                    | M             | T             | I                     | M             | T             | 1254    |        |           |
|             | 2.10%                | 2.10%         | 95.80%        | 0.00%                 | 0.00%         | 100.00%       |         |        |           |
| 6           | T                    | <b>I*</b>     |               | T                     | <b>I*</b>     |               | 1260    |        |           |
|             | 89.60%               | <b>10.40%</b> |               | 96.70%                | <b>3.30%</b>  |               |         |        |           |
| 7           | <b>N*</b>            | <b>E*</b>     | V             | <b>N*</b>             | <b>E*</b>     | V             | 1276    |        |           |
|             | <b>31.40%</b>        | <b>68.60%</b> | 0.00%         | <b>53.30%</b>         | <b>43.30%</b> | 3.30%         |         |        |           |
| 8           | <b>D*</b>            | <b>H*</b>     |               | <b>D*</b>             | <b>H*</b>     |               | 1291    |        |           |
|             | <b>78.40%</b>        | <b>21.60%</b> |               | <b>100.00%</b>        | <b>2.00%</b>  |               |         |        |           |
| 9           | N                    | Q             |               | N                     | Q             |               | 1298    |        |           |
|             | 70.00%               | 30.00%        |               | 76.70%                | 23.30%        |               |         |        |           |
| 10          | K                    | T             |               | K                     | T             |               | 1317    |        |           |
|             | 86.30%               | 13.70%        |               | 93.30%                | 6.70%         |               |         |        |           |
| 11          | <b>D*</b>            | <b>P*</b>     | <b>H*</b>     | <b>D*</b>             | <b>P*</b>     | <b>H*</b>     | 1326    |        |           |
|             | <b>41.40%</b>        | <b>58.60%</b> | <b>0.00%</b>  | <b>68.60%</b>         | <b>19.60%</b> | <b>10.80%</b> |         |        |           |
| 12          | Q                    | E             | G             | Q                     | E             | G             | 1329    |        |           |
|             | 0.00%                | 28.00%        | 72.00%        | 3.30%                 | 26.70%        | 70.00%        |         |        |           |
| 13          | P                    | S             |               | P                     | S             |               | 1336    |        |           |
|             | 30.00%               | 70.00%        |               | 34.40%                | 68.60%        |               |         |        |           |
| 14          | I                    | T             |               | I                     | T             |               | 1365    |        |           |
|             | 73.50%               | 26.50%        |               | 70.00%                | 30.00%        |               |         |        |           |
| 15          | TKQN                 | PQQN          | TKTK          | PQQK                  | TKQN          | PQQN          | TKTK    | PQQK   | 1385-1388 |
|             | 16.00%               | 11.00%        | 29.00%        | 44%                   | 38.00%        | 40.00%        | 7.00%   | 15.00% |           |
| 16          | GIEGE                | GIERE         | EIEKD         | GIEGE                 | GIERE         | EIEKD         |         |        | 1407-1411 |
|             | 28.00%               | 37.00%        | 35.00%        | 30.00%                | 40.00%        | 30.00%        |         |        |           |
| 17          | I                    | T             |               | I                     | T             |               | 1424    |        |           |
|             | 92.20%               | 7.80%         |               | 86.70%                | 13.30%        |               |         |        |           |
| 18          | G                    | I             | V             | G                     | I             | V             | 1434    |        |           |
|             | 50.00%               | 50.00%        | 0.00%         | 52.00%                | 38.00%        | 10.00%        |         |        |           |
| 19          | <b>S*</b>            | <b>F*</b>     |               | <b>S*</b>             | <b>F*</b>     |               | 1450    |        |           |
|             | <b>44.00%</b>        | <b>56.00%</b> |               | <b>20.00%</b>         | <b>80.00%</b> |               |         |        |           |
| 20          | <b>R*</b>            | <b>Q*</b>     | E             | <b>R</b>              | <b>Q</b>      | E             | 1467    |        |           |
|             | <b>36.70%</b>        | <b>63.30%</b> | 0.00%         | <b>52.90%</b>         | <b>35.30%</b> | <b>0.00%</b>  |         |        |           |
| 21          | <b>N*</b>            | <b>I*</b>     |               | <b>N*</b>             | <b>I*</b>     |               | 1478    |        |           |
|             | <b>74.50%</b>        | <b>25.50%</b> |               | <b>40.00%</b>         | <b>60.00%</b> |               |         |        |           |
| 22          | N                    | E             |               | N                     | E             |               | 1482    |        |           |
|             | 80.60%               | 19.40%        |               | 86.20%                | 13.80%        |               |         |        |           |
| 23          | C                    | Y             |               | C                     | Y             |               | 1486    |        |           |
|             | 94.60%               | 5.40%         |               | 100.00%               | 0.00%         |               |         |        |           |
| 24          | N                    | Q             |               | N                     | Q             |               | 1493    |        |           |
|             | 41.40%               | 58.60%        |               | 40.00%                | 60.00%        |               |         |        |           |
| 25          | <b>D*</b>            | <b>K*</b>     | N             | <b>D*</b>             | <b>K*</b>     | N             | 1496    |        |           |
|             | <b>56.70%</b>        | <b>36.70%</b> | 3.30%         | <b>93.90%</b>         | <b>4.10%</b>  | 2.00%         |         |        |           |
| 26          | I                    | V             |               | I                     | V             |               | 1497    |        |           |
|             | 76.00%               | 24.00%        |               | 65.60%                | 34.40%        |               |         |        |           |
| 27          | A                    | D             |               | A                     | D             |               | 1500    |        |           |
|             | 56.00%               | 44.00%        |               | 56.70%                | 43.30%        |               |         |        |           |

### Supplementary Table 1. Relative proportions of toggling amino acids at each amino acid position.

Amino acids found to toggle were stratified by gravidity. Relative proportions of occupying amino acids at each respective site within each group are represented as a percentage. Nine sites (shown in grey and denoted by an asterisk) were found to differ statistically significantly ( $\chi^2$ ,  $P < 0.05$ ) between the gravidity groups.
